# Supplementary material
Source: PubMed Central journal article supplement (PMC4706787)
Supplement: NIHMS744627-supplement-10549_2015_3649_MOESM1_ESM.pdf [file NIHMS744627-supplement-10549_2015_3649_MOESM1_ESM.pdf]

## Supplemental Materials

### **184AA3: a xenograft model of ER<sup>+</sup> breast adenocarcinoma**

*William C. Hines\*†‡, Irene Kuhn\*‡, Kate Thi\*, Barbie Chu\*, Gaelen Stanford-Moore\*, Rocío Sampayo§, James C. Garbe\*, Martha Stampfer\*, Alexander D. Borowsky|| and Mina Bissell\*†*

*\*Life Sciences Division, Lawrence Berkeley National Laboratory; Mailstop 977R225A, 1 Cyclotron Road; Berkeley, CA 94720, USA; §Área Investigación, Instituto de Oncología Angel H. Roffo-UBA, Buenos Aires, Argentina; ||Department of Pathology and Laboratory Medicine and Center for Comparative Medicine, University of California, Davis.*

Figure S1a

AA3 Xenograft 16.3R

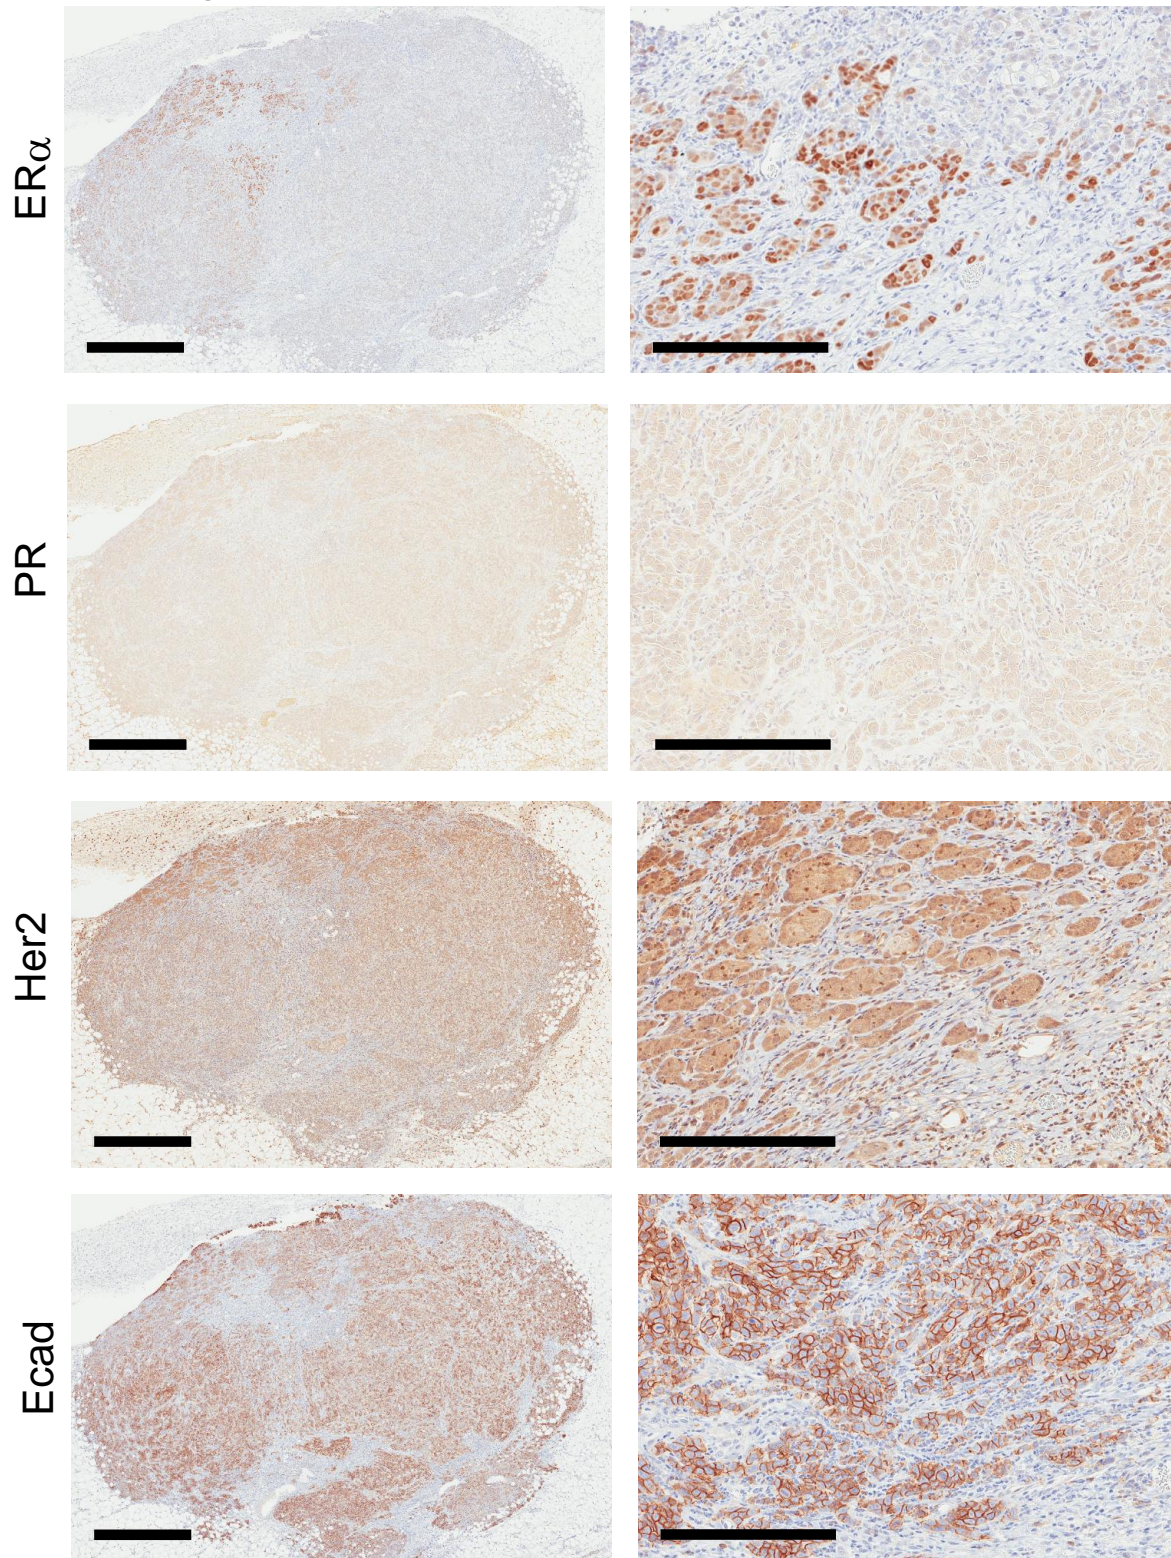

**Supplemental Figure 1a. Characterization of 184AA3 xenografts.** 184AA3-derived xenograft tumor immunostained with antibodies specific for Estrogen Receptor (ER), Progesterone receptor (PR), Her2, and E-cadherin (Ecad). Scale bars = 800  $\mu$ m (low magnification image, left) and 200  $\mu$ m (high magnification image, right).

Figure S1b

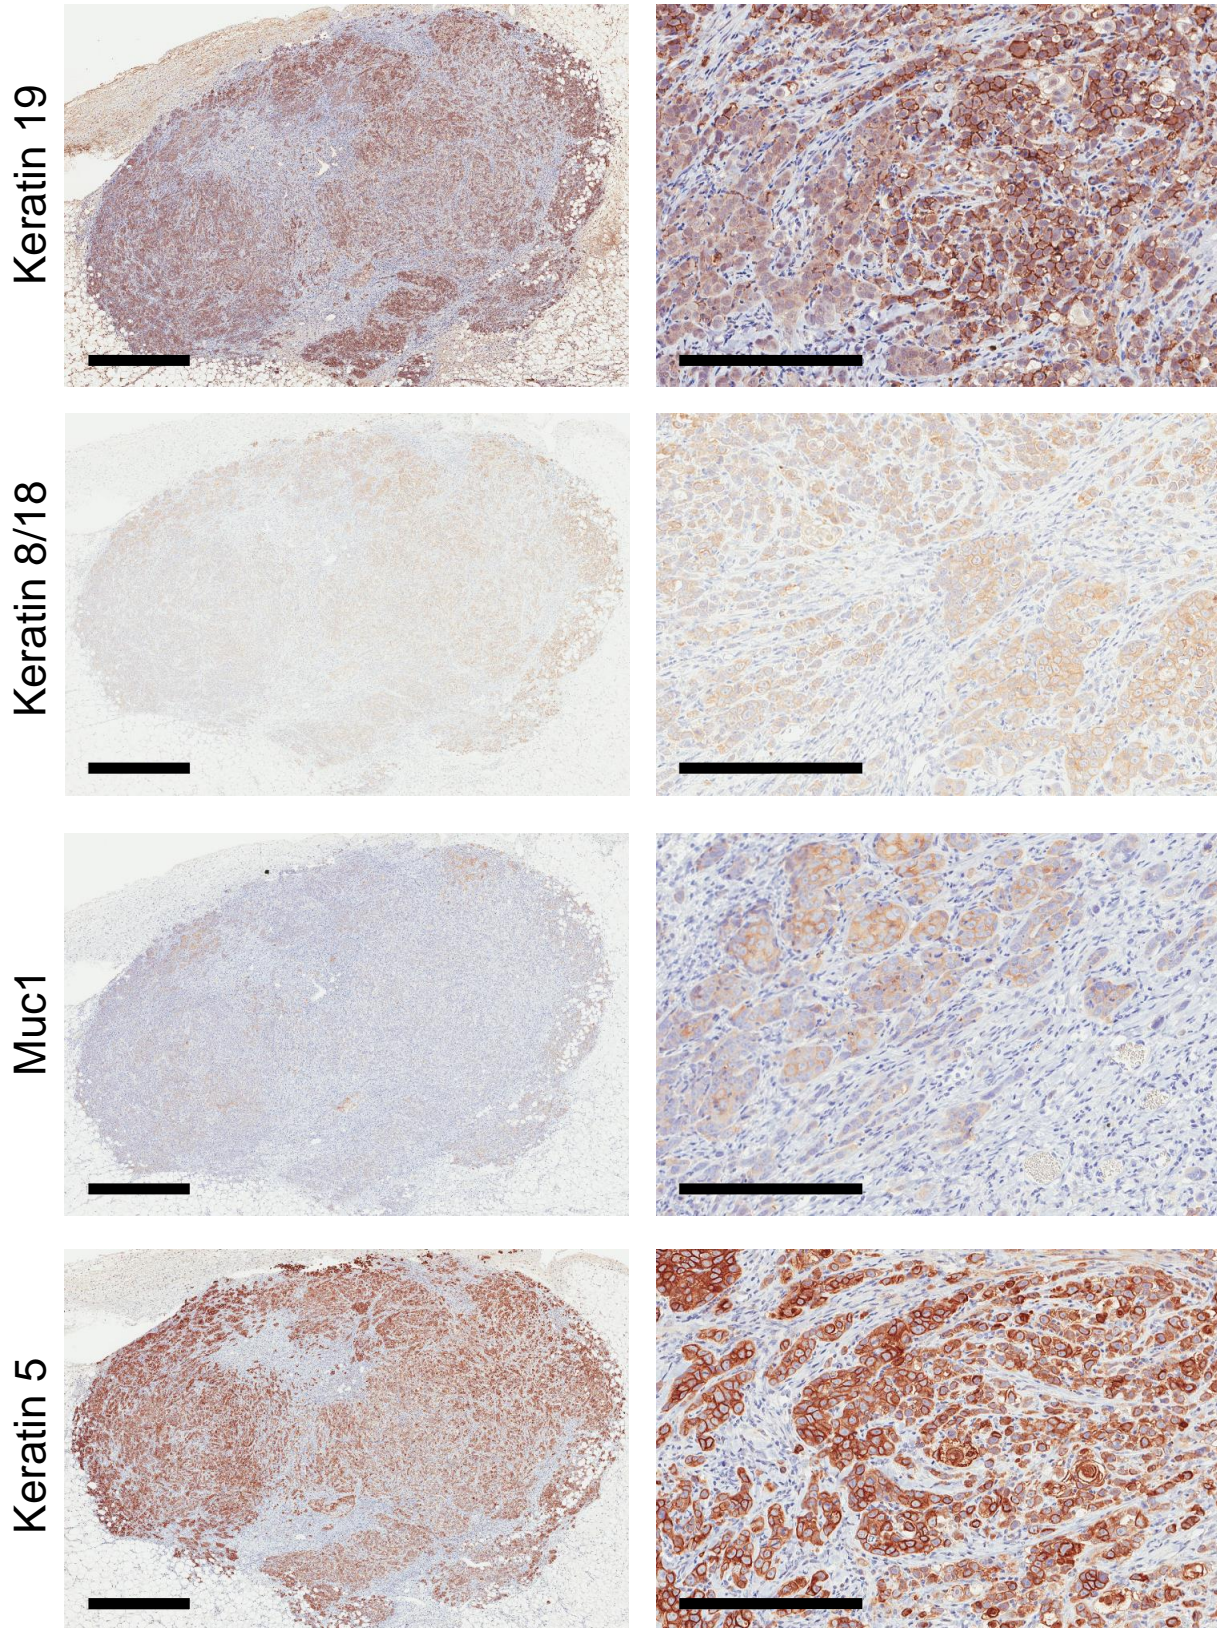

**Supplemental Figure 1b. Characterization of 184AA3 xenografts.** 184AA3-derived xenograft tumor immunostained with antibodies specific for Keratin 19, Keratin 8/18, Muc1, and Keratin 5. Scale bars = 800µm (low magnification image, left) and 200µm (high magnification image, right).

Figure S1c

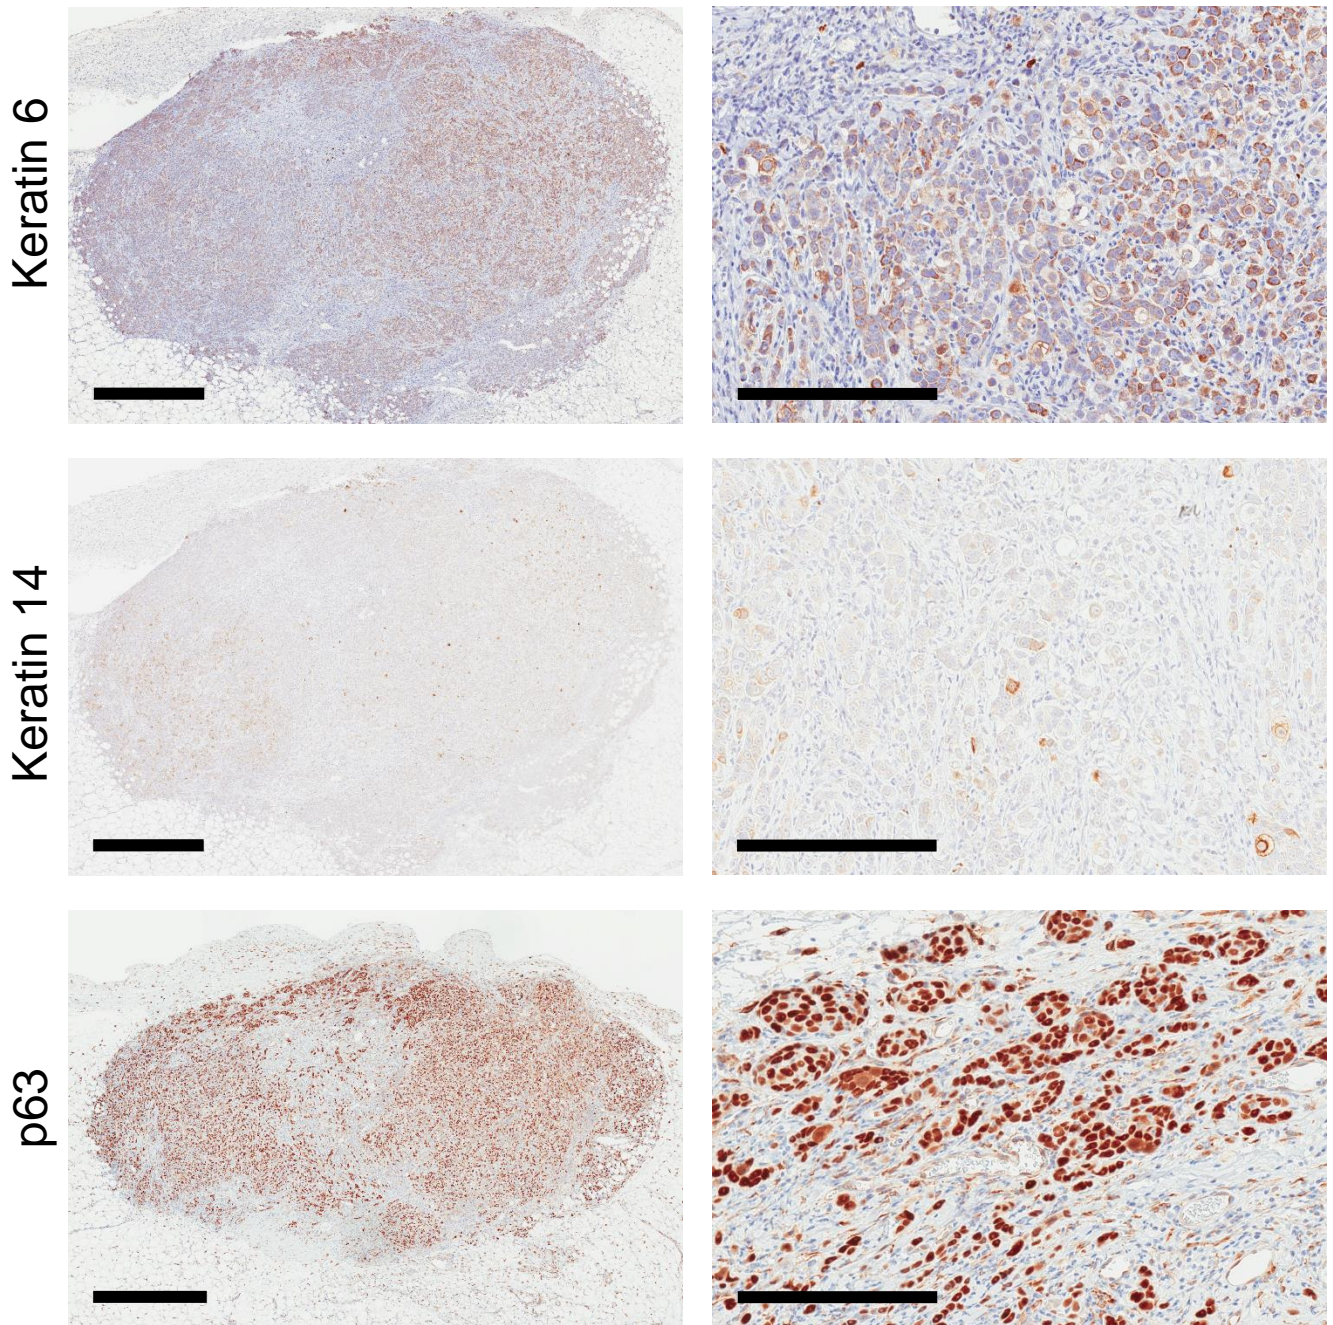

S1d

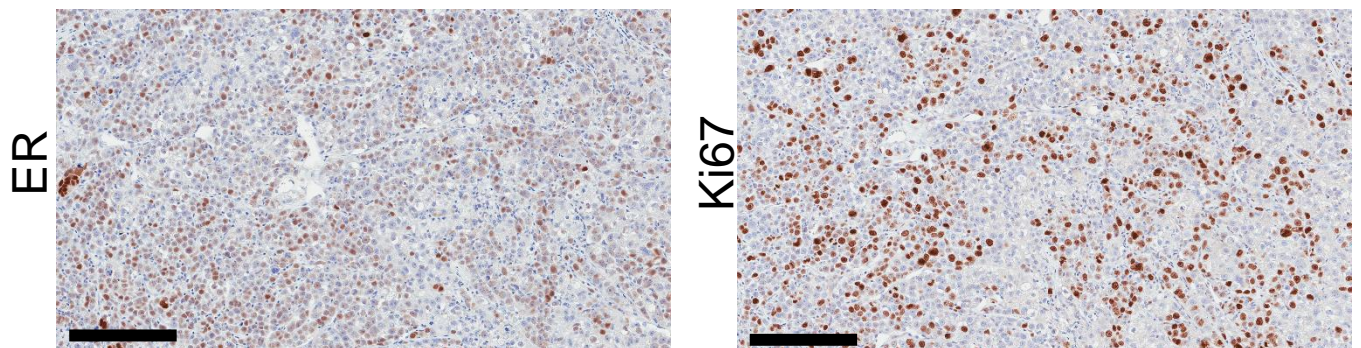

**Supplemental Figure 1c. Characterization of 184AA3 xenografts.** 184AA3-derived xenograft tumor Immunostained with antibodies specific for Keratin 6, Keratin 14, p63.

**d)**184AA3 xenograft #25.12R, immunostained for ER and Ki-67. Scale bars = 800 $\mu$ m (low magnification image, left) and 200 $\mu$ m (high magnification image, right).

Figure S2

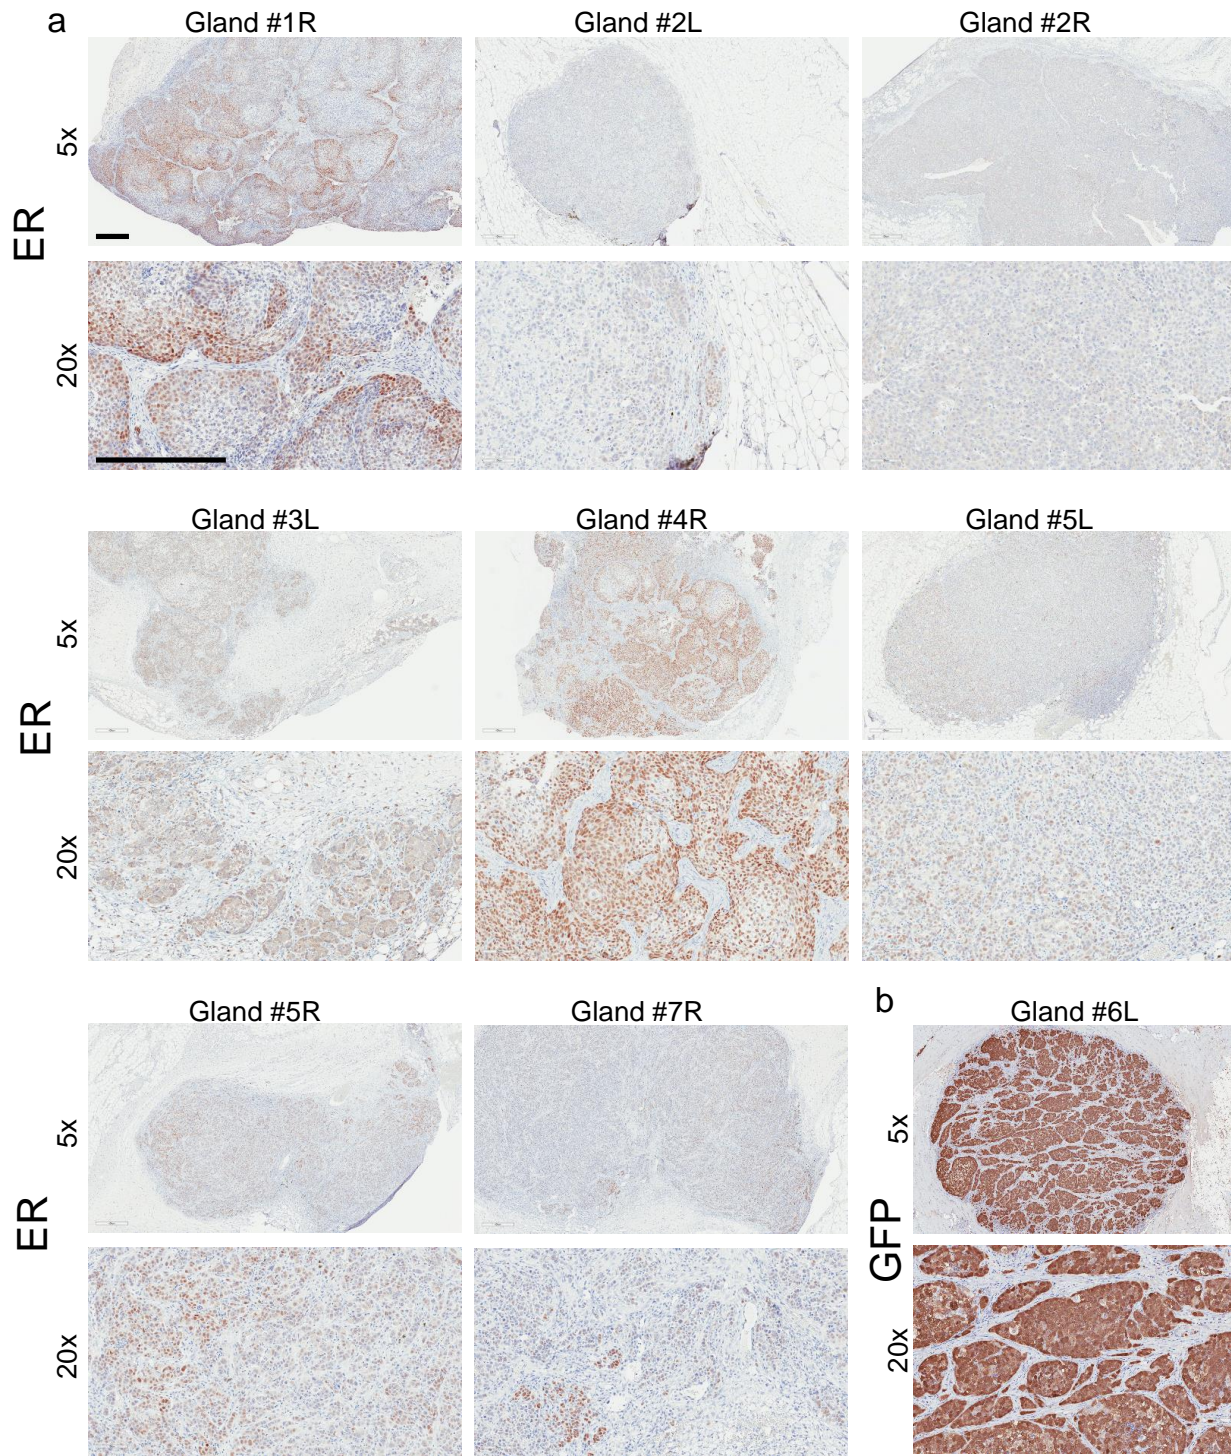

**Supplemental Figure 2. ER expression in 184AA3 xenografts.**

(a) ER immunostained sections of the 8 tumors formed in Experimental group HM20. H&E staining and growth curves of these tumors are provided in Figure 2.

(b) Xenograft HM29.6, formed by 184AA3-H2b-GFP labeled cells. GFP was detected in paraffin sections by immunohistochemistry. Scale bars = 400 $\mu$ m (5x zoom) and 100 $\mu$ m (20x zoom).

Figure S3

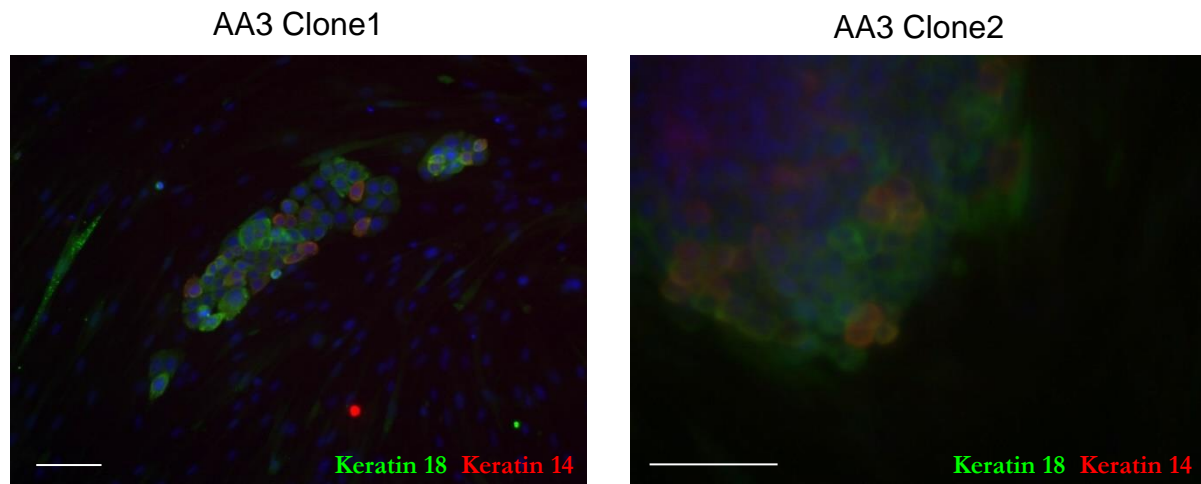

**Supplemental Figure 3. 184AA3 clonal colonies.** Keratin 18 (green) and Keratin 14 (red) immunostained colonies derived from single cells. Single 184AA3 cells were seeded directly into wells of a 96 well dish, each containing a subconfluent monolayer of ZsGreen-labeled primary breast fibroblasts. Cells were immunostained after 2 weeks in culture. Scale bars = 100 $\mu$ m.

Figure S4

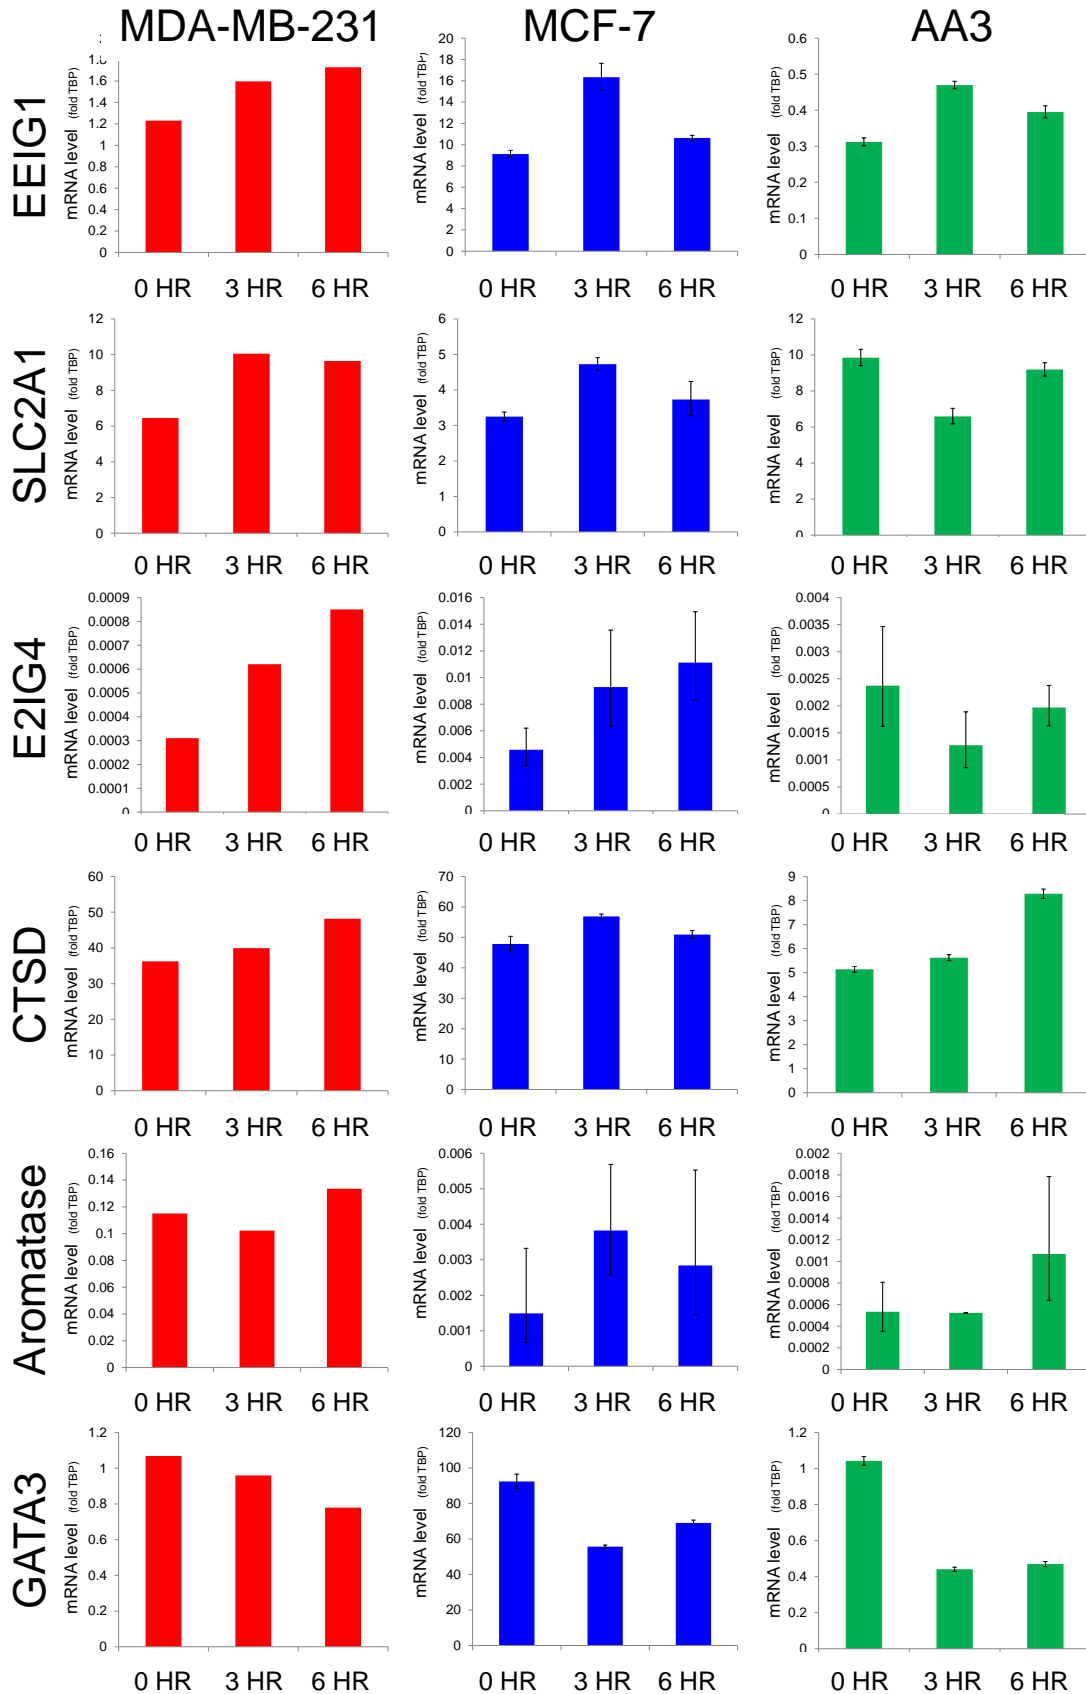

**Supplemental Figure 4. ER functionality in 184AA3.** Gene expression changes resulting from 3-hour and 6-hour estradiol stimulation of 184AA3 and reference cell lines MDA-MB-231 and MCF-7. Three of the nine genes measured by qRT-PCR are shown in Figure 5c. Shown here are: EEIG1, SLC2A1, E2IG4, CTSD, Aromatase, and GATA3. Transcripts were measured by qRT-PCR and are expressed as fold differences relative to TBP.

Figure S5

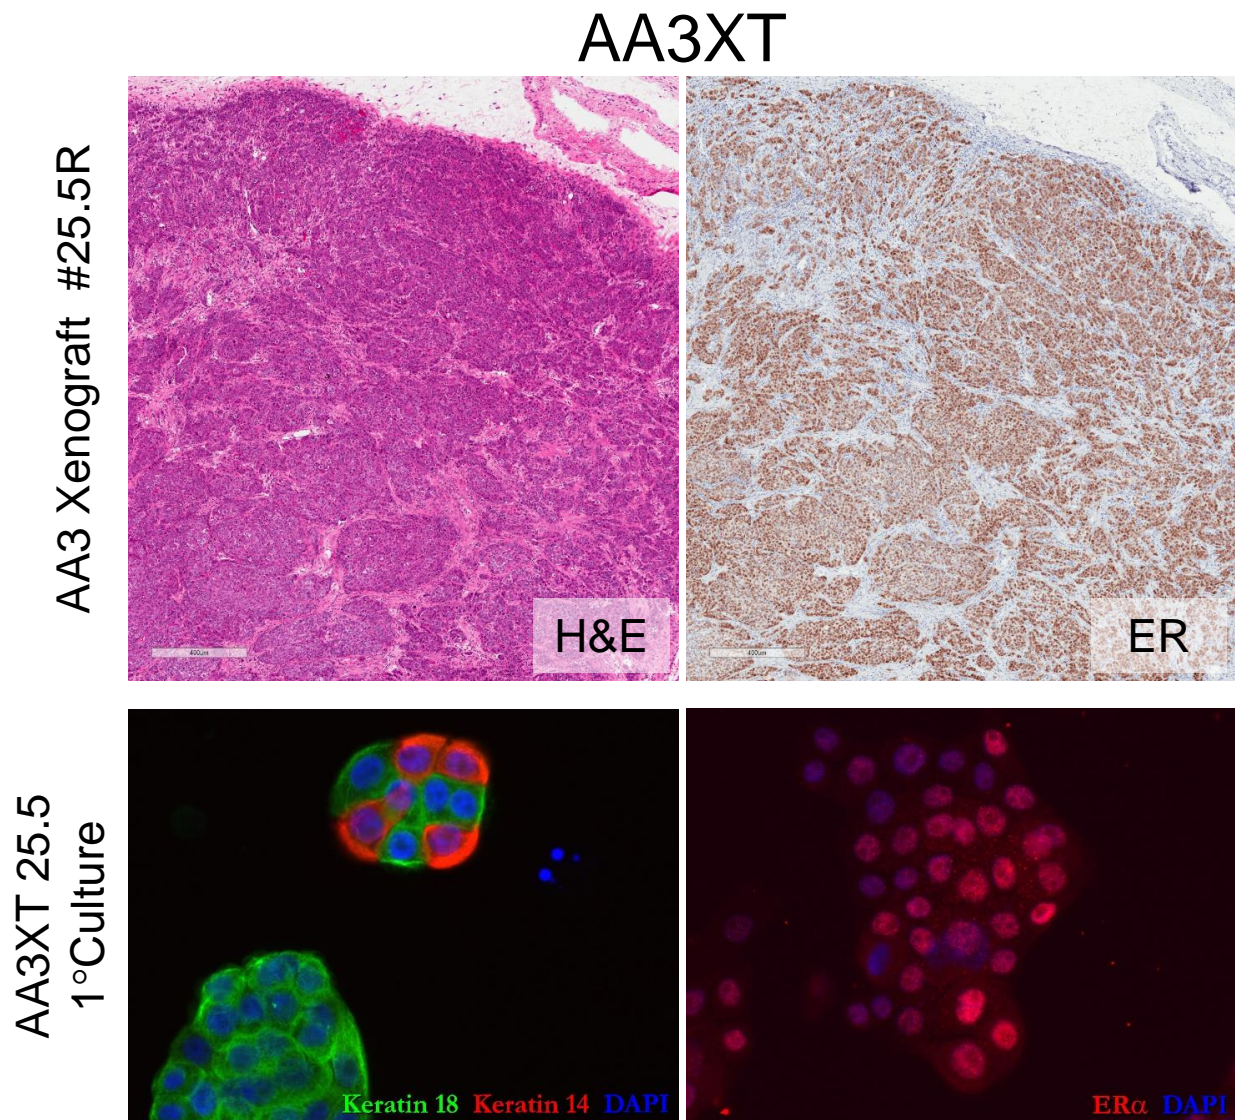

**Supplemental Figure 5. 184AA3XT derivation and characterization.** The 184AA3XT strain was derived from a primary culture of an 184AA3-derived tumor, HM25.5R. The tumor was minced and initially embedded into 3D matrigel. 184AA3XT cells were subsequently harvested from the matrigel culture and seeded onto a dish coated with a thin layer of Collagen I (Purecol, Advanced Biomatrix). Cultures were immunostained with keratin 14, keratin 18, and ER.



Figure S6

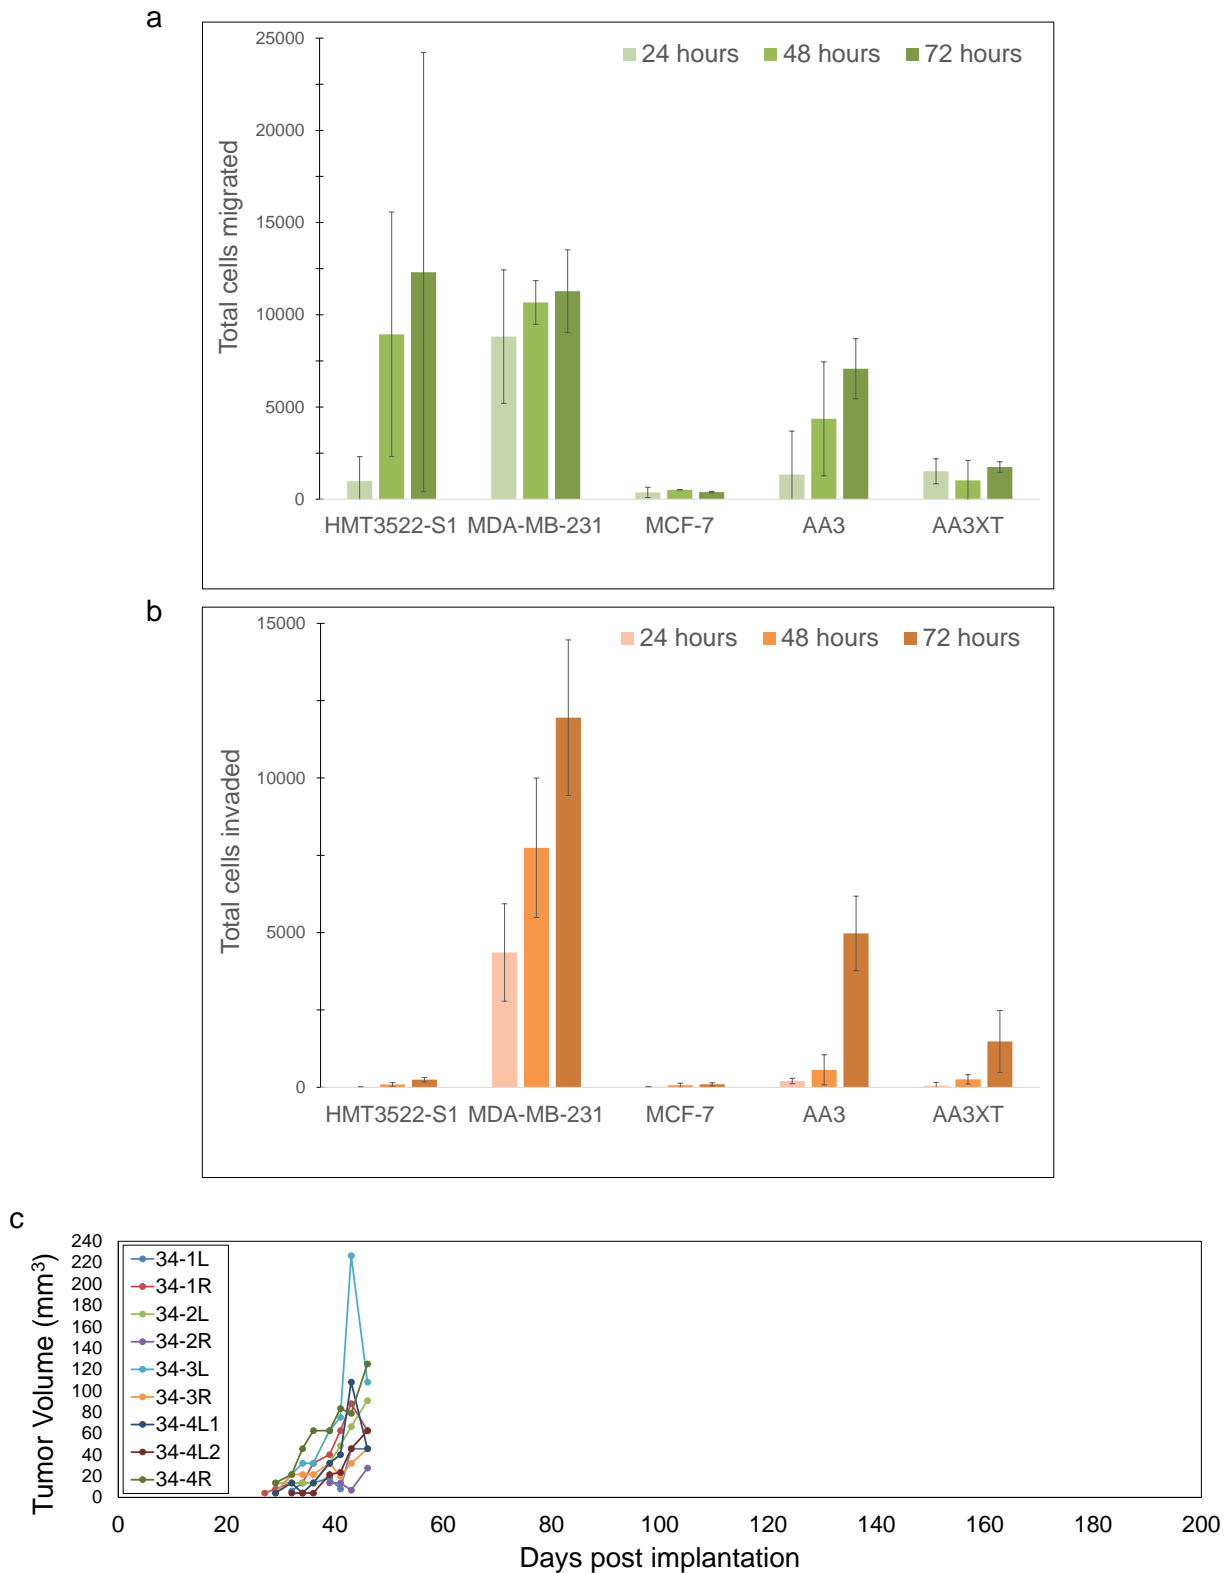

**Supplemental Figure 6. 184AA3XT migration, invasion and in vivo growth.** (a) Migration through Boyden chamber (top) or invasion through matrigel coated chamber (bottom). The functional ability of 184AA3XT and 184AA3 cells to migrate and invade through matrigel was measured at 24-, 48, and 72-hours after cells were seeded into the top of a Boyden chamber with 8 $\mu$ m pores. (b) 184AA3XT were grafted into NSG mice as described in methods. Appearance and growth of the tumors was vastly accelerated compared to the parent line (Compare growth to that shown in Figure 2a)

Figure S7

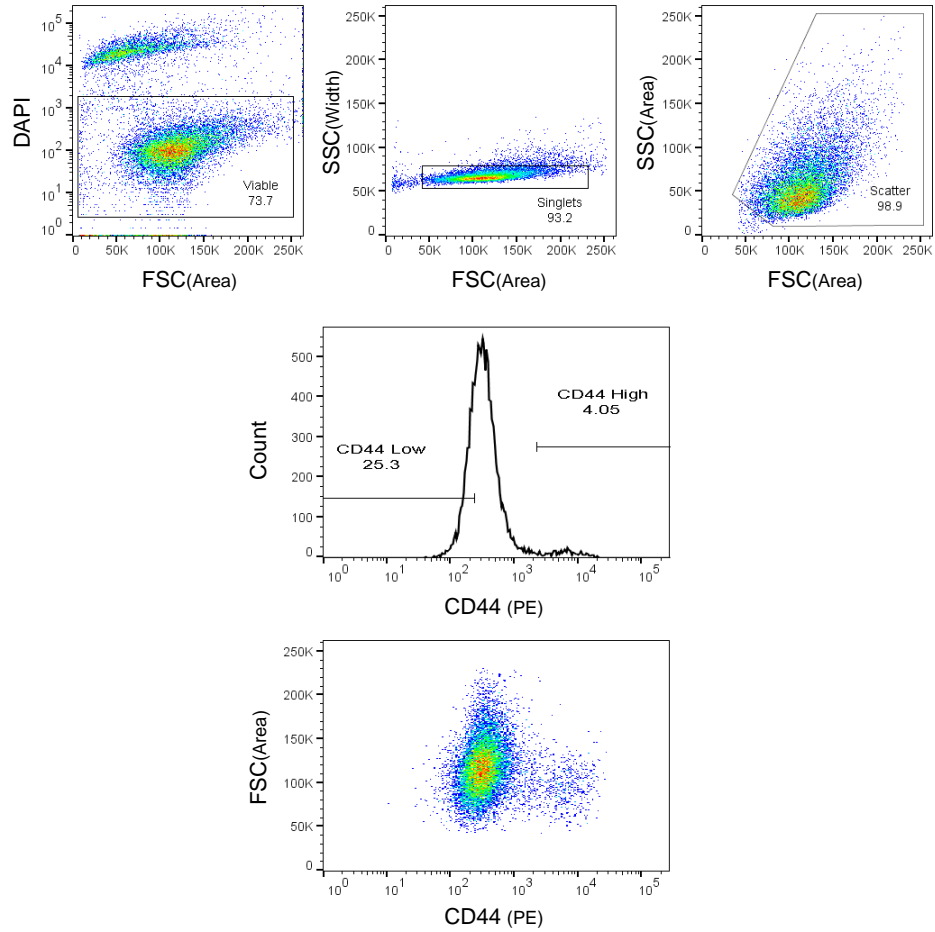

**Supplemental Figure 7. CD44 FACS sorting gates.** Full backgating illustrating how CD44High and CD44Low 184AA3 cells were FACS sorted.

**Supplementary Table 1. Antibodies**

| <b>Antibody specificity</b>                      | <b>Clone</b>          | <b>Conjugate</b>     | <b>Source</b>             | <b>Dilution</b> | <b>Figure</b>             |
|--------------------------------------------------|-----------------------|----------------------|---------------------------|-----------------|---------------------------|
| Muc1 (CD227)                                     | HMPV                  | FITC and unlabeled   | BD Biosciences 559774     | 1:100           | Fig. 1b,3b,3c             |
| Thy1 (CD90)                                      | 5E10                  | PE/Cy5               | BioLegend 328112          | 1:40            | Fig.3b,3c                 |
| E-Cadherin                                       | 67A4                  | Alexafluor488        | BioLegend 324110          | 1:40            | Fig. 1b,3b,3c             |
| CALLA (CD10)                                     | HI10a                 | Brilliant Violet 421 | BioLegend 312217          | 1:20            | Fig.3b                    |
| CD24                                             | ML5                   | PE                   | BioLegend 311106          | 1:40            | Fig.3b,3c                 |
| CD44                                             | 515                   | PE                   | BD Biosciences 550989     | 1:40            | Fig.3b,3c,4a,S3b          |
| EpCAM                                            | 9C4                   | FITC                 | BioLegend 324203          | 1:40            | Fig.3b,3c                 |
| $\alpha$ 6 Integrin (CD49f)                      | GoH3                  | Brilliant Violet 421 | BioLegend 313624          | 1:40            | Fig.3b,3c                 |
| Keratin 14                                       | Rabbit polyclonal     | None                 | Thermo RB-9020            | 1:400           | Fig. 1b,3a,3c,S3a,S6      |
| Keratin 19                                       | A53-B/A2.26           | None                 | Thermo MS-198             | 1:400           | Fig.3c                    |
| Keratin 18                                       | DC10                  | None                 | Thermo MS142P0            | 1:400           | Fig. 1b,3a,3c,S3a,S6      |
| P63                                              | 4A4                   | None                 | Abcam ab32353             | 1:100           | Fig.3c                    |
| Estrogen Receptor (ER)                           | SP1                   | None                 | Thermo RM-9101            | 1:50            | Fig. 1b,3c,5b             |
| Estrogen Receptor (ER)                           | HC20                  | None                 | Santa Cruz SC543          | 1:100           | FigS5                     |
| Progesterone Receptor (PR)                       | PgR636                | None                 | Dako M356929-2            | 1:100           | Fig.3c                    |
| Smooth muscle actin                              | 1A4                   | None                 | Thermo MS-113             | 1:100           | Fig. 1b                   |
| Vimentin                                         | Polyclonal            | None                 | NeoMarkers RB-9063        | 1:200           | Fig. 1b                   |
| CD56                                             | HCD56                 | FITC                 | BioLegend 318303          | 1:40            | Fig.3c                    |
| Ki67                                             | Ki-67                 | None                 | BioLegend Rb-1510         | 1:100           | Fig. S1d                  |
| $\alpha$ tubulin                                 | DM1A                  | None                 | Santa Cruz Biotechnology  | 1:200           | Fig. 5b                   |
| <b>Center for Comparative Medicine, UC Davis</b> |                       |                      |                           |                 |                           |
| <b>Antibody specificity</b>                      | <b>Clone</b>          | <b>Conjugate</b>     | <b>Source</b>             | <b>Dilution</b> | <b>Figure</b>             |
| Her2                                             | EP1045Y               | None                 | ThermoScientific RM-2112  | 1:1000          | Fig.S1a                   |
| Ecad                                             | Rabbit polyclonal     | None                 | Abcam, ab53033*           | 1:1200          | Fig. 1b,S1a               |
| K19                                              | EPNCIR127 B           | None                 | Epitomics, 3863           | 1:1200          | Fig.S1a                   |
| K8/18                                            | Guinea pig polyclonal | None                 | Fitzgerald, 20R-CP004     | 1:2000          | Fig. 1b,S1a               |
| Muc1                                             | HMPV                  | None                 | Pharmlingen, 550486       | 1:400           | Fig. 1b,S1a               |
| K5                                               | EP1601Y               | None                 | Abcam, ab52635            | 1:1000          | Fig.S1a                   |
| K6                                               | Rabbit polyclonal     | None                 | Abcam, ab24646*           | 1:2000          | Fig.S1a                   |
| K14                                              | Rabbit polyclonal     | None                 | Neomarker, Rb-9020        | 1:1000          | Fig.S1a                   |
| P63                                              | EPR5701               | None                 | Epitomics, 5353           | 1:2000          | Fig.S1a                   |
| ER                                               | SP1                   | None                 | ThermoScientific, RM-9101 | 1:100           | Fig. 1b,2b,6d,S1a,S1d,S2a |
| ER                                               | HC-20                 | None                 | Santa Cruze Biotechnology | 1:100           | Fig. 6b                   |
| PR                                               | Rabbit polyclonal     | None                 | Dako, A0098               | 1:500           | Fig.S1a                   |
| Ki-67                                            | Ab4                   | None                 | ThermoScientific, RB-1510 | 1:800           | Fig.6d                    |
| GFP                                              | Goat Polyclonal       | None                 | Abcam, ab6673             | 1:800           | Fig.S2b                   |

\*No longer available

**Supplementary Table 2. qRT-PCR Primers**

| <b>Gene</b>         | <b>Forward Primer</b>     | <b>Reverse Primer</b>       |
|---------------------|---------------------------|-----------------------------|
| TBP                 | 5' CACGAACCACGGCACTGATT   | 5' TTTTCTTGCTGCCAGTCTGGAC   |
| ER (ESR1)           | 5' TGATTGGTCTCGTCTGGCG    | 5' CATGCCCTCTACACATTTTCCC   |
| PDZK1               | 5' CAGACTTCACTGTTGGTGGTAG | 5' CATTGGGCAGTTCTTGACTTTG   |
| B4GALT1             | 5' CGCCACTCAAGAGACAAGAA   | 5' GAGTGAGTTCAAACCATCAGAGA  |
| EEIG1 (FAM102A)     | 5' GAGGTTCACCTTCGTGTGTAAG | 5' CGAAGCCCAGCTTGAATAA      |
| SLC2A1              | 5' CAGATGATGCGGGAGAAGAA   | 5' CGAAGATGCTCGTGGAGTAATA   |
| E2IG4 (TSKU)        | 5' GACCCAATGCACTTTCTTG    | 5' GCTGCTACTCCTGTGCTAAT     |
| CTSD                | 5' AGTGCTTCACAGTCGTCTTC   | 5' GGACTTGTCGCTGTTGTACT     |
| Aromatase (CYP19A1) | 5' GTCTGGATCTCTGGAGAGGAAA | 5' GCCGAATCGAGAGCTGTAATG    |
| GATA3               | 5' ACACTCTGGAGGAGGAATGCCA | 5' TTCGGTTTCTGGTCTGGATGCCTT |
